# Supplementary material for: Lithium stabilizes square-two-dimensional metal sheets: a computational exploration
Source: Royal Society of Chemistry journal article supplement (doi:10.1039/d2nr02079c), 2022-01-01
Supplement: d2nr02079c1.pdf [file d2nr02079c1.pdf]

Supporting Information

**Lithium Stabilizes Square Two-Dimensional Metal Sheets:  
A Computational Exploration**

Jie Li<sup>a,#</sup>, Yu Liu<sup>a,#</sup>, Linke Yu<sup>a</sup>, Haihong Meng<sup>a</sup>, Jinxing Gu<sup>b</sup>, Fengyu Li<sup>a,\*</sup>

*<sup>a</sup> School of Physical Science and Technology, Inner Mongolia University, Hohhot, 010021, P.R.China*

*<sup>b</sup> Department of Chemistry, The Institute for Functional Nanomaterials, University of Puerto Rico, Rio Piedras Campus, San Juan, PR 00931, USA*

\*Corresponding Author: [fengyuli@imu.edu.cn](mailto:fengyuli@imu.edu.cn) (FL)

# Equal contribution to this work

**Table S1.** The reaction pathway and the  $\Delta ZPE - T\Delta S$  (in eV) of forming the intermediates on the  $M_2Li$ -I sheets.

|                           | *CO <sub>2</sub> | *COOH/*OCHO | *HCOOH | *HCO  |
|---------------------------|------------------|-------------|--------|-------|
| Sb <sub>2</sub> Li-I      | 0.46             | 0.19/0.23   | /      | /     |
| Bi <sub>2</sub> Li-I      | 0.46             | 0.24/0.27   | /      | /     |
| <b>Ag<sub>2</sub>Li-I</b> | 0.46             | 0.21/0.22   | 0.30   | -0.47 |
| Au <sub>2</sub> Li-I      | 0.46             | 0.22/0.23   | /      | /     |

**Table S2.** Space group (SG), cohesive energy, lattice parameters and bond lengths of the 2D  $M_2Li$  sheets. The  $E_{coh}$  in parenthesis refer to the square M monolayer. The length data in parenthesis denote the bond length in the  $M_4Li_2$  clusters of  $D_{4h}$  symmetry.

|                        | SG            | Symmetry   | $E_{coh}$ (eV/atom) | $a$ (Å) | $b$ (Å) | M-M (Å)     | M-Li (Å)    |
|------------------------|---------------|------------|---------------------|---------|---------|-------------|-------------|
| Al <sub>2</sub> Li-I   | <i>P4/mmm</i> | $D^1_{4h}$ | -2.59 (-1.75)       | 2.69    | 2.69    | 2.69 (2.64) | 2.92 (2.84) |
| Ga <sub>2</sub> Li-I   | <i>P4/mmm</i> | $D^1_{4h}$ | -2.28 (-1.61)       | 2.66    | 2.66    | 2.66 (2.60) | 2.93 (2.79) |
| In <sub>2</sub> Li-I   | <i>P4/mmm</i> | $D^1_{4h}$ | -2.04 (-1.40)       | 3.12    | 3.12    | 3.12 (3.05) | 3.00 (3.00) |
| Tl <sub>2</sub> Li-I   | <i>P4/mmm</i> | $D^1_{4h}$ | -1.80 (-1.26)       | 3.32    | 3.32    | 3.32 (3.18) | 3.10 (3.06) |
| Ge <sub>2</sub> Li-I   | <i>P4/mmm</i> | $D^1_{4h}$ | -3.40 (-2.83)       | 2.74    | 2.74    | 2.74 (2.57) | 2.80 (2.79) |
| Sn <sub>2</sub> Li-I   | <i>P4/mmm</i> | $D^1_{4h}$ | -2.91 (-1.92)       | 3.09    | 3.09    | 3.09 (2.92) | 3.03 (2.91) |
| Pb <sub>2</sub> Li-I   | <i>P4/mmm</i> | $D^1_{4h}$ | -2.85 (-2.38)       | 3.24    | 3.24    | 3.24 (3.35) | 3.11 (3.06) |
| Sb <sub>2</sub> Li-I   | <i>P4/mmm</i> | $D^1_{4h}$ | -2.46 (-3.40)       | 3.12    | 3.12    | 3.12 (3.05) | 3.00 (2.74) |
| Bi <sub>2</sub> Li-I   | <i>P4/mmm</i> | $D^1_{4h}$ | -2.35 (-3.35)       | 3.26    | 3.26    | 3.26 (3.10) | 3.11 (2.82) |
| Cu <sub>2</sub> Li-I   | <i>P4/mmm</i> | $D^1_{4h}$ | -2.52 (-1.77)       | 2.47    | 2.47    | 2.47 (2.44) | 2.59 (2.44) |
| Ag <sub>2</sub> Li-I   | <i>P4/mmm</i> | $D^1_{4h}$ | -2.25 (-1.32)       | 2.83    | 2.83    | 2.83 (2.84) | 2.77 (2.57) |
| Au <sub>2</sub> Li-I   | <i>P4/mmm</i> | $D^1_{4h}$ | -2.69 (-2.04)       | 2.77    | 2.77    | 2.78 (2.84) | 2.73 (2.52) |
| Hg <sub>2</sub> Li-I   | <i>P4/mmm</i> | $D^1_{4h}$ | -0.75 (-0.54)       | 3.10    | 3.10    | 3.10 (3.37) | 2.92 (2.81) |
| Sb <sub>2</sub> Li-II  | <i>P21/m</i>  | $C^2_{2h}$ | -2.44               | 3.06    | 11.21   | 3.01/3.11   | 2.95/3.11   |
| Sb <sub>2</sub> Li-III | <i>Pmmm</i>   | $D^1_{2h}$ | -2.41               | 3.02    | 3.04    | 4.94        | 2.89        |
| Sb <sub>2</sub> Li-IV  | <i>P6mm</i>   | $C^1_{6v}$ | -2.16               | 5.15    | 5.15    | 2.97        | 3.01        |
| Sb <sub>2</sub> Li-V   | <i>P6mm</i>   | $C^1_{6v}$ | -2.14               | 6.21    | 6.21    | 3.11/3.34   | 2.82        |
| Sb <sub>2</sub> Li-VI  | <i>P4/mmm</i> | $D^1_{4h}$ | -1.73               | 4.88    | 4.88    | 3.45        | 2.44        |
| Bi <sub>2</sub> Li-II  | <i>P21/m</i>  | $C^2_{2h}$ | -2.31               | 3.21    | 11.81   | 3.25/3.24   | 3.22/3.00   |
| Bi <sub>2</sub> Li-III | <i>Pmmm</i>   | $D^1_{2h}$ | -2.26               | 3.19    | 3.20    | 5.03        | 2.98        |
| Bi <sub>2</sub> Li-IV  | <i>P6mm</i>   | $C^1_{6v}$ | -2.03               | 5.36    | 5.36    | 3.09        | 3.13        |
| Bi <sub>2</sub> Li-V   | <i>P6mm</i>   | $C^1_{6v}$ | -2.05               | 6.50    | 6.50    | 3.25/3.49   | 2.91        |
| B <sub>2</sub> Li-VI   | <i>P4/mmm</i> | $D^1_{4h}$ | -1.67               | 5.07    | 5.07    | 3.59        | 2.54        |
| Ag <sub>2</sub> Li-II  | <i>P21/m</i>  | $C^2_{2h}$ | -2.18               | 2.80    | 10.25   | 2.78/2.80   | 2.81/2.69   |
| Ag <sub>2</sub> Li-III | <i>Pmmm</i>   | $D^1_{2h}$ | -2.14               | 2.82    | 2.71    | 4.50        | 2.66        |
| Ag <sub>2</sub> Li-IV  | <i>P6mm</i>   | $C^1_{6v}$ | -2.03               | 4.77    | 4.77    | 2.76        | 2.80        |
| Ag <sub>2</sub> Li-V   | <i>P6mm</i>   | $C^1_{6v}$ | -2.10               | 5.50    | 5.50    | 2.95/2.75   | 3.35/2.64   |
| Ag <sub>2</sub> Li-VI  | <i>P4/mmm</i> | $D^1_{4h}$ | -1.30               | 4.82    | 4.82    | 3.41        | 2.41        |
| Au <sub>2</sub> Li-II  | <i>P21/m</i>  | $C^2_{2h}$ | -2.60               | 2.77    | 10.19   | 2.73/2.78   | 2.61/2.78   |
| Au <sub>2</sub> Li-III | <i>Pmmm</i>   | $D^1_{2h}$ | -2.57               | 2.77    | 2.72    | 4.32        | 2.57        |
| Au <sub>2</sub> Li-IV  | <i>P6mm</i>   | $C^1_{6v}$ | -2.50               | 4.68    | 4.68    | 2.70        | 2.74        |
| Au <sub>2</sub> Li-V   | <i>P6mm</i>   | $C^1_{6v}$ | -2.48               | 5.43    | 5.43    | 2.72/2.98   | 2.58        |
| Au <sub>2</sub> Li-VI  | <i>P4/mmm</i> | $D^1_{4h}$ | -1.88               | 4.65    | 4.65    | 3.29        | 2.33        |

**Table S3.** Space group (SG), cohesive energy, lattice parameters and bond lengths of the square M (Al, Ga, In, Tl, Ge, Sn, Pb, Sb, Bi, Cu, Ag, Au, Hg) monolayers.

|    | SG            | Symmetry   | $E_{coh}$ (eV/atom) | $a$ (Å) | $b$ (Å) | M–M (Å) |
|----|---------------|------------|---------------------|---------|---------|---------|
| Al | <i>P4/mmm</i> | $D_{4h}^1$ | -2.58               | 2.63    | 2.63    | 2.63    |
| Ga | <i>P4/mmm</i> | $D_{4h}^1$ | -2.23               | 2.59    | 2.59    | 2.59    |
| In | <i>P4/mmm</i> | $D_{4h}^1$ | -1.90               | 2.96    | 2.96    | 2.96    |
| Tl | <i>P4/mmm</i> | $D_{4h}^1$ | -1.64               | 3.10    | 3.10    | 3.10    |
| Ge | <i>P4/mmm</i> | $D_{4h}^1$ | -3.66               | 2.59    | 2.59    | 2.59    |
| Sn | <i>P4/mmm</i> | $D_{4h}^1$ | -2.57               | 2.99    | 2.99    | 2.99    |
| Pb | <i>P4/mmm</i> | $D_{4h}^1$ | -2.71               | 3.15    | 3.15    | 3.15    |
| Sb | <i>P4/mmm</i> | $D_{4h}^1$ | -2.10               | 2.97    | 2.97    | 2.97    |
| Bi | <i>P4/mmm</i> | $D_{4h}^1$ | -1.97               | 3.13    | 3.13    | 3.13    |
| Cu | <i>P4/mmm</i> | $D_{4h}^1$ | -2.45               | 2.38    | 2.38    | 2.38    |
| Ag | <i>P4/mmm</i> | $D_{4h}^1$ | -1.79               | 2.72    | 2.72    | 2.72    |
| Au | <i>P4/mmm</i> | $D_{4h}^1$ | -2.43               | 2.67    | 2.67    | 2.67    |
| Hg | <i>P4/mmm</i> | $D_{4h}^1$ | -0.07               | 2.83    | 3.66    | 3.66    |

**Table S4.** The  $E_{coh}$  (in eV per atom) of  $M_2Li$ -I sheets and bulk  $M_mLi_n$ , space group (SG) of bulk  $M_mLi_n$ . Data in parenthesis refer to the  $E_{coh}$  of M bulk.

| system               | $E_{coh}$     | $M_mLi_n$ bulk                               | SG                        | $E_{coh}$ |
|----------------------|---------------|----------------------------------------------|---------------------------|-----------|
| Al <sub>2</sub> Li-I | -2.59 (-3.52) | Al <sub>2</sub> Li <sub>3</sub> <sup>i</sup> | <i>R3 m</i>               | -2.55     |
| Ga <sub>2</sub> Li-I | -2.28 (-2.68) | Ga <sub>2</sub> Li <sup>ii</sup>             | <i>Cmcm</i>               | -2.25     |
| In <sub>2</sub> Li-I | -2.04 (-2.42) | InLi <sub>2</sub> <sup>ii</sup>              | <i>Cmcm</i>               | -2.13     |
| Tl <sub>2</sub> Li-I | -1.80 (-4.08) | TlLi <sup>iii</sup>                          | <i>Pm3m</i>               | -2.04     |
| Ge <sub>2</sub> Li-I | -3.40 (-5.21) | GeLi <sup>iv</sup>                           | <i>I4<sub>1</sub>/a</i>   | -2.93     |
| Sn <sub>2</sub> Li-I | -2.91 (-3.17) | SnLi <sup>v</sup>                            | <i>P2/m</i>               | -3.99     |
| Pb <sub>2</sub> Li-I | -2.85 (-3.31) | PbLi <sup>vi</sup>                           | <i>Pm3m</i>               | -2.71     |
| Sb <sub>2</sub> Li-I | -2.46 (-2.67) | SbLi <sub>2</sub> <sup>vii</sup>             | <i>P-62c</i>              | -2.54     |
| Bi <sub>2</sub> Li-I | -2.35 (-2.52) | BiLi <sup>viii</sup>                         | <i>P4/mmm</i>             | -2.45     |
| Cu <sub>2</sub> Li-I | -2.52 (-3.48) | --                                           | --                        | --        |
| Ag <sub>2</sub> Li-I | -2.2 (-2.49)  | AgLi <sup>ix</sup>                           | <i>Fm3m</i>               | -2.26     |
| Au <sub>2</sub> Li-I | -2.69 (-2.98) | AuLi <sub>3</sub> <sup>x</sup>               | <i>Fm3m</i>               | -2.34     |
| Hg <sub>2</sub> Li-I | -0.75 (-1.67) | Hg <sub>3</sub> Li <sup>xi</sup>             | <i>P6<sub>3</sub>/mmc</i> | -0.72     |
| Li bulk              | -1.57         |                                              |                           |           |

<sup>i</sup> K.F. Tebbe, H.G. von Schnering, B. Rueter and G. Rabeneck, Zeitschrift fuer Naturforschung. Teil B. Anorganische Chemie, Organische Chemie, 1973, **28**, 600.

<sup>ii</sup> J. Stoehr, W. Mueller and H. Schaefer, Studies in Inorganic Chemistry, 1983, **3**, 753.

<sup>iii</sup> W. Baden, P.C. Schmidt and A. Weiss, Physica Status Solidi, A, 1979, **51**, 183.

<sup>iv</sup> E. Menges, V. Hopf, H. Schaefer and A. Weiss, Zeitschrift fuer Naturforschung, Teil B. Anorganische Chemie, Organische Chemie, 1969, **24**, 1351.

<sup>v</sup> W. Mueller and H. Schaefer, Zeitschrift fuer Naturforschung, Teil B. Anorganische Chemie, Organische Chemie, 1973, **28**, 246.

<sup>vi</sup> H.N. Nowotny, Zeitschrift fuer Metallkunde, 1941, **33**, 388.

<sup>vii</sup> W. Mueller, Darstellung und Struktur der Phase Li<sub>2</sub>Sb Zeitschrift fuer Naturforschung, Teil B. Anorganische Chemie, Organische Chemie, 1977, **32**, 357-359.

<sup>viii</sup> E. Zintl and G. Brauer, Zeitschrift fur Elektrochemie, 1935, **41**, 297.

<sup>ix</sup> R. W. G. Wyckoff, Second edition. Interscience Publishers, New York, New York Note: CsCl structure, cesium chloride structure Crystal Structures, 1963, **1**, 85-237.

<sup>x</sup> J. Verma, and G. Kienast, Das Verhalten der Alkalimetalle zu Kupfer, Silber und Gold Zeitschrift fuer Anorganische und Allgemeine Chemie, 1961, **310**, 143-169.

<sup>xi</sup> E. Zintl and A. Schneider, Zeitschrift fuer Elektrochemie und Angewandte Physikalische Chemie, 1935, **41**, 771.

**Table S5.** The computed elastic constants ( $C_{11}$ ,  $C_{22}$ ,  $C_{12}$ ,  $C_{44}$ , in N/m) of the  $M_2Li-I$  monolayers. The mechanically stable  $M_2Li-I$  was highlighted in bold.

|                           | $C_{11}$ | $C_{22}$ | $C_{12}$ | $C_{44}$ |
|---------------------------|----------|----------|----------|----------|
| <b>Al<sub>2</sub>Li-I</b> | 34.83    | 34.83    | -2.19    | 1.02     |
| Ga <sub>2</sub> Li-I      | 22.89    | 22.89    | 80.75    | -5.97    |
| In <sub>2</sub> Li-I      | -7.82    | -7.82    | 9.68     | 15.28    |
| <b>Tl<sub>2</sub>Li-I</b> | 28.36    | 28.36    | 16.05    | 8.61     |
| <b>Ge<sub>2</sub>Li-I</b> | 80.83    | 80.83    | 15.18    | 34.41    |
| <b>Sn<sub>2</sub>Li-I</b> | 83.69    | 83.69    | -20.49   | 27.77    |
| Pb <sub>2</sub> Li-I      | 10.28    | 10.28    | -51.91   | 10.43    |
| <b>Sb<sub>2</sub>Li-I</b> | 71.55    | 71.55    | -17.38   | 18.26    |
| <b>Bi<sub>2</sub>Li-I</b> | 68.95    | 68.95    | -21.77   | 3.66     |
| Cu <sub>2</sub> Li-I      | 110.49   | 110.49   | 14.33    | -6.98    |
| <b>Ag<sub>2</sub>Li-I</b> | 72.91    | 72.91    | -2.04    | 5.96     |
| <b>Au<sub>2</sub>Li-I</b> | 122.32   | 122.32   | 10.08    | 22.05    |
| <b>Hg<sub>2</sub>Li-I</b> | 34.84    | 34.84    | -2.19    | 1.02     |

**Table S6.** The lowest adsorption energies of H, CO<sub>2</sub> ( $E_{ad}$ , in eV) and the free energy change ( $\Delta G$ , in eV) for forming \*COOH and \*OCHO on the  $M_2Li-I$  (M = Sb, Bi, Ag and Au).

| Metal                     | $E_{ad}(H)$ | $E_{ad}(CO_2)$ | $\Delta G(*COOH)$ | $\Delta G(*OCHO)$ |
|---------------------------|-------------|----------------|-------------------|-------------------|
| <b>Sb<sub>2</sub>Li-I</b> | /           | <b>-0.09</b>   | 2.26              | 1.87              |
| <b>Bi<sub>2</sub>Li-I</b> | /           | <b>-0.15</b>   | 1.79              | 0.75              |
| <b>Ag<sub>2</sub>Li-I</b> | 2.17        | <b>-0.23</b>   | 1.46              | <b>0.40</b>       |
| <b>Au<sub>2</sub>Li-I</b> | /           | <b>-0.42</b>   | 1.74              | 0.97              |

**Table S7.** The adsorption energies of H ( $E_{ad}$ , in eV) on the Ag<sub>2</sub>Li-I.

| Site   | $E_{ad}$    |
|--------|-------------|
| bridge | 2.19        |
| top    | <b>2.17</b> |
| hollow | 2.23        |

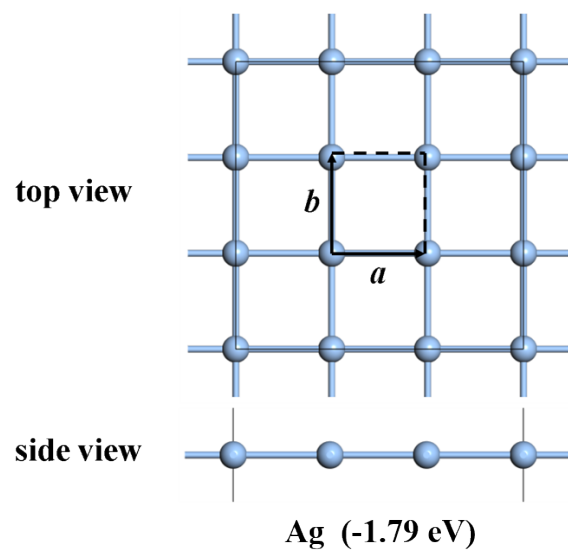

**Fig. S1** Top and side views of the square M (represented by Ag structure) monolayer,  $a$  and  $b$  represent the lattice vectors. Data in parenthesis are the cohesive energies per atom.

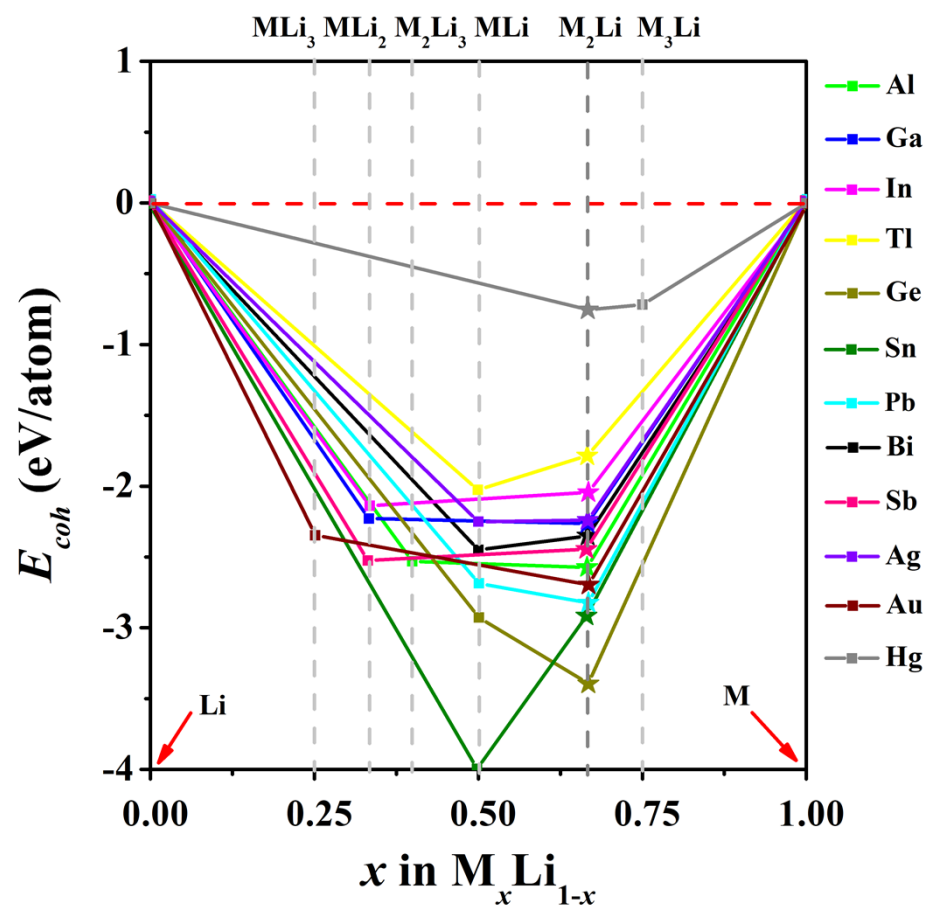

**Fig. S2** The convex hull diagram of the  $M_xLi_{1-x}$  system, the “star” in the figure corresponding to our  $M_2Li$ -I ( $M = Al, Ga, In, Tl, Ge, Sn, Pb, Bi, Sb, Ag, Au$  and  $Hg$ ) systems.

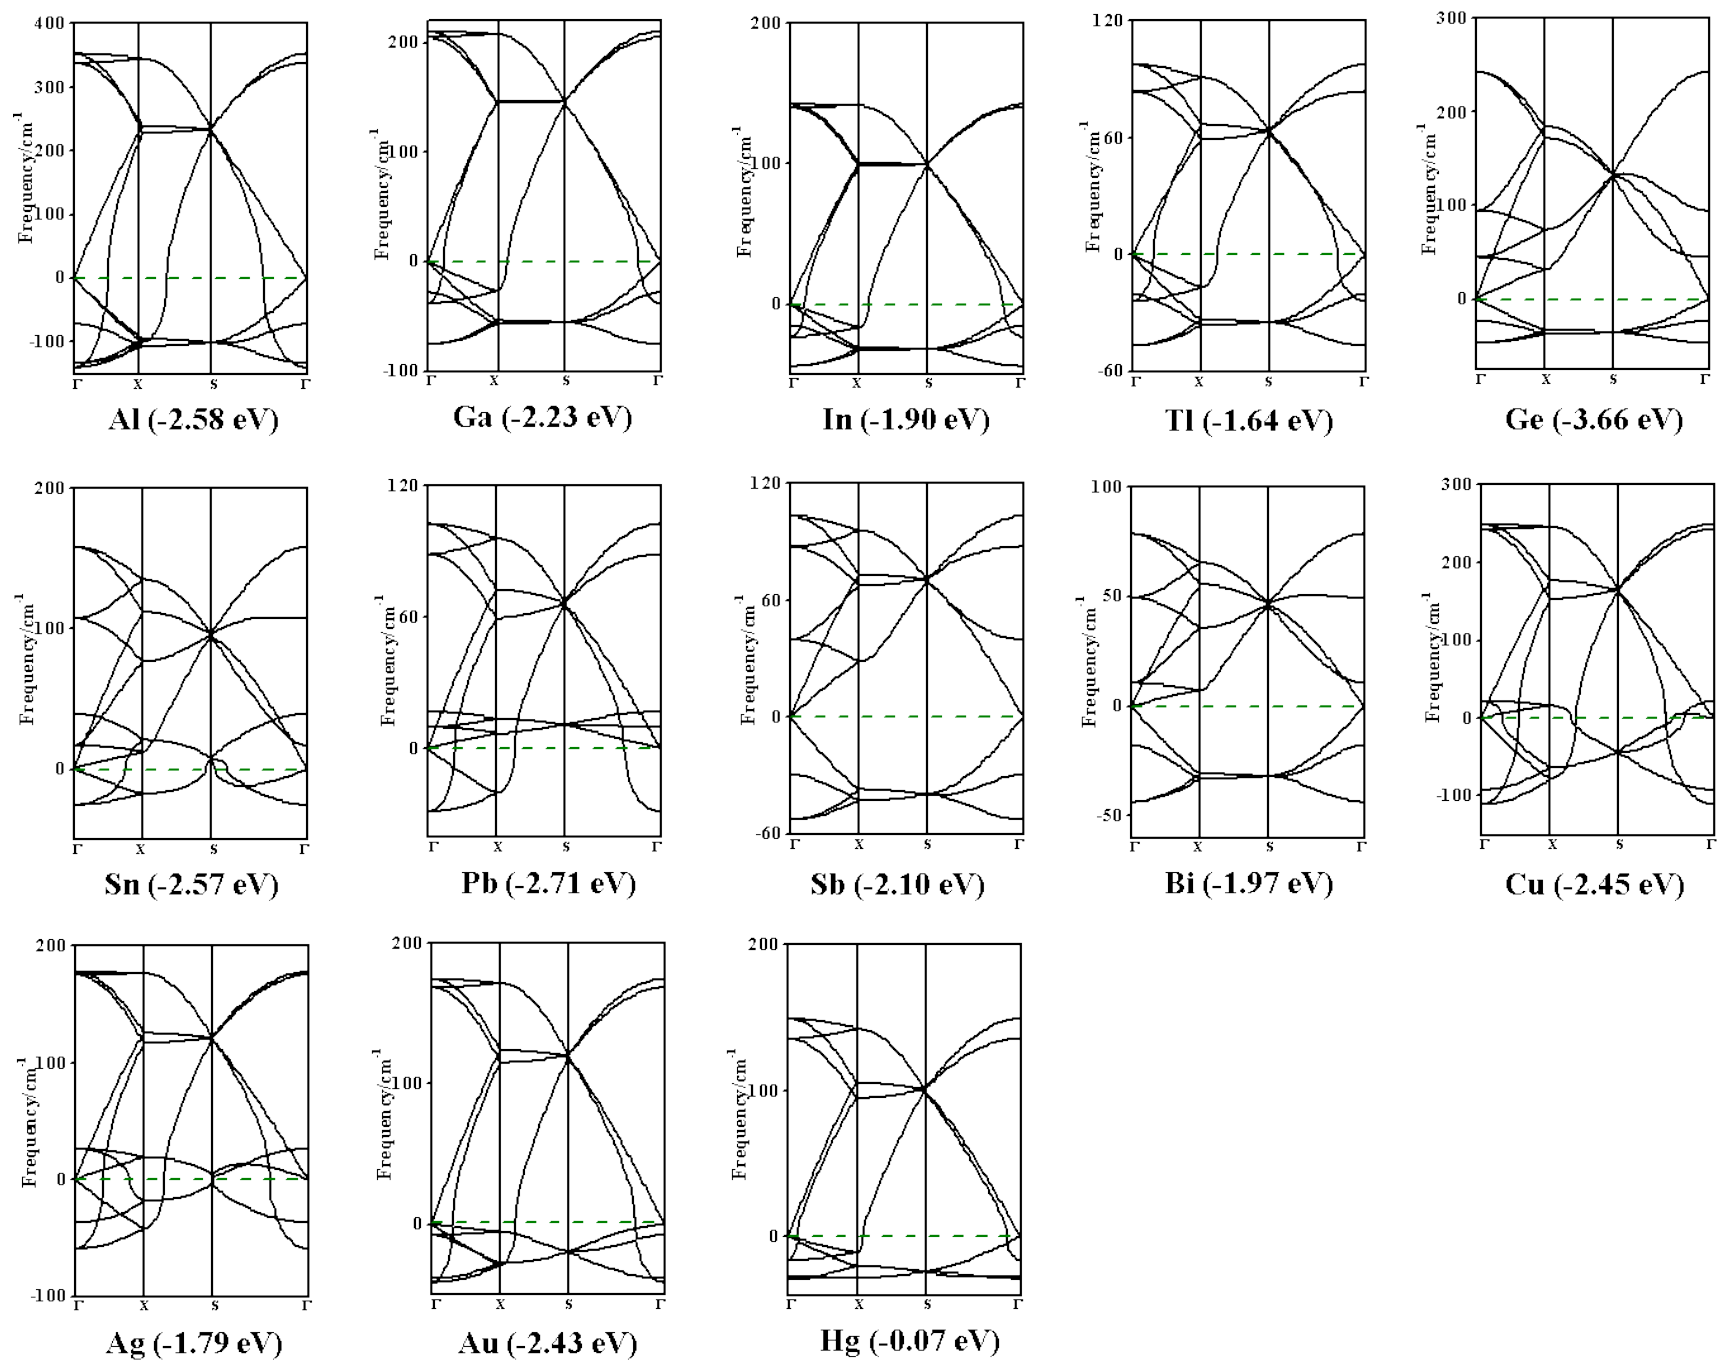

**Fig. S3** The computed phonon dispersions of the square M monolayers. Data in parenthesis are the cohesive energies per atom.

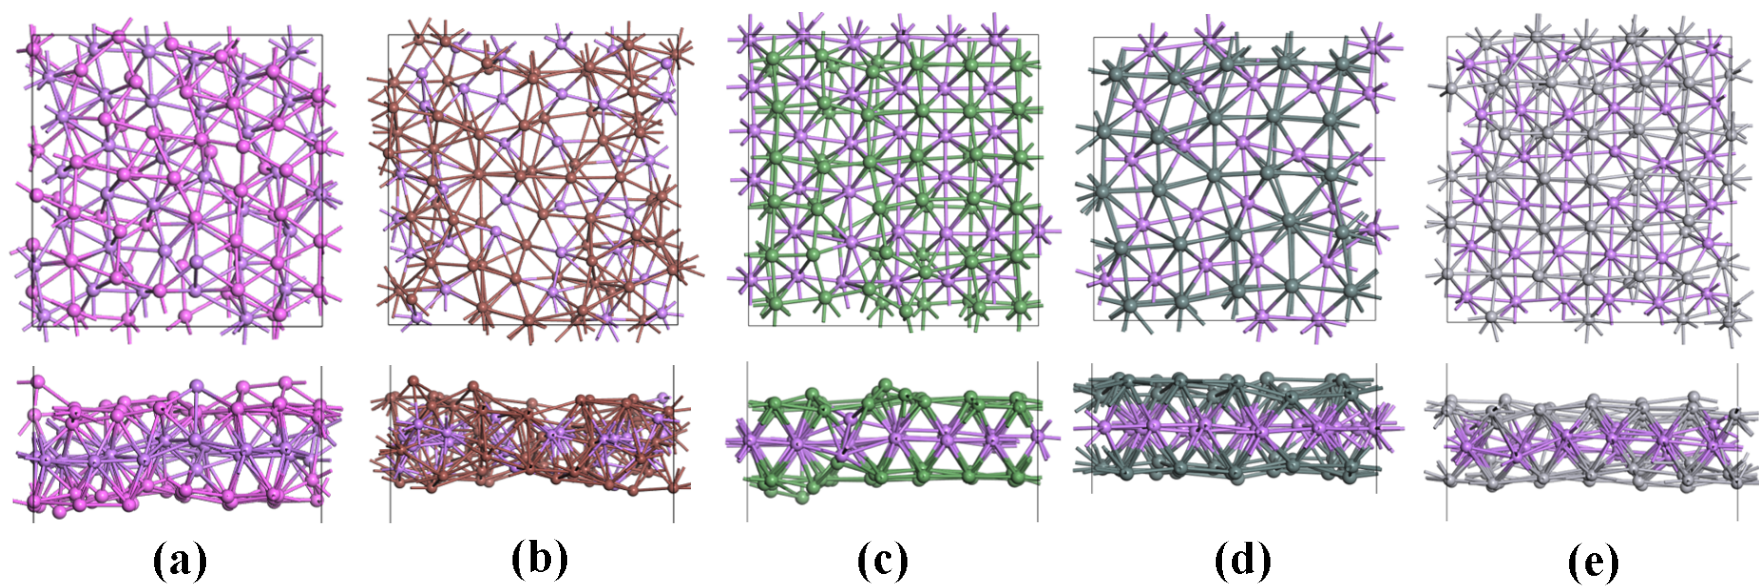

**Fig. S4** The final structures of  $M_2Li-I$  monolayers through 5 ps's FPMD simulations at 300 K:  $Al_2Li-I$  (a),  $Tl_2Li-I$  (b),  $Ge_2Li-I$  (c),  $Sn_2Li-I$  (d), and  $Hg_2Li-I$  (e).

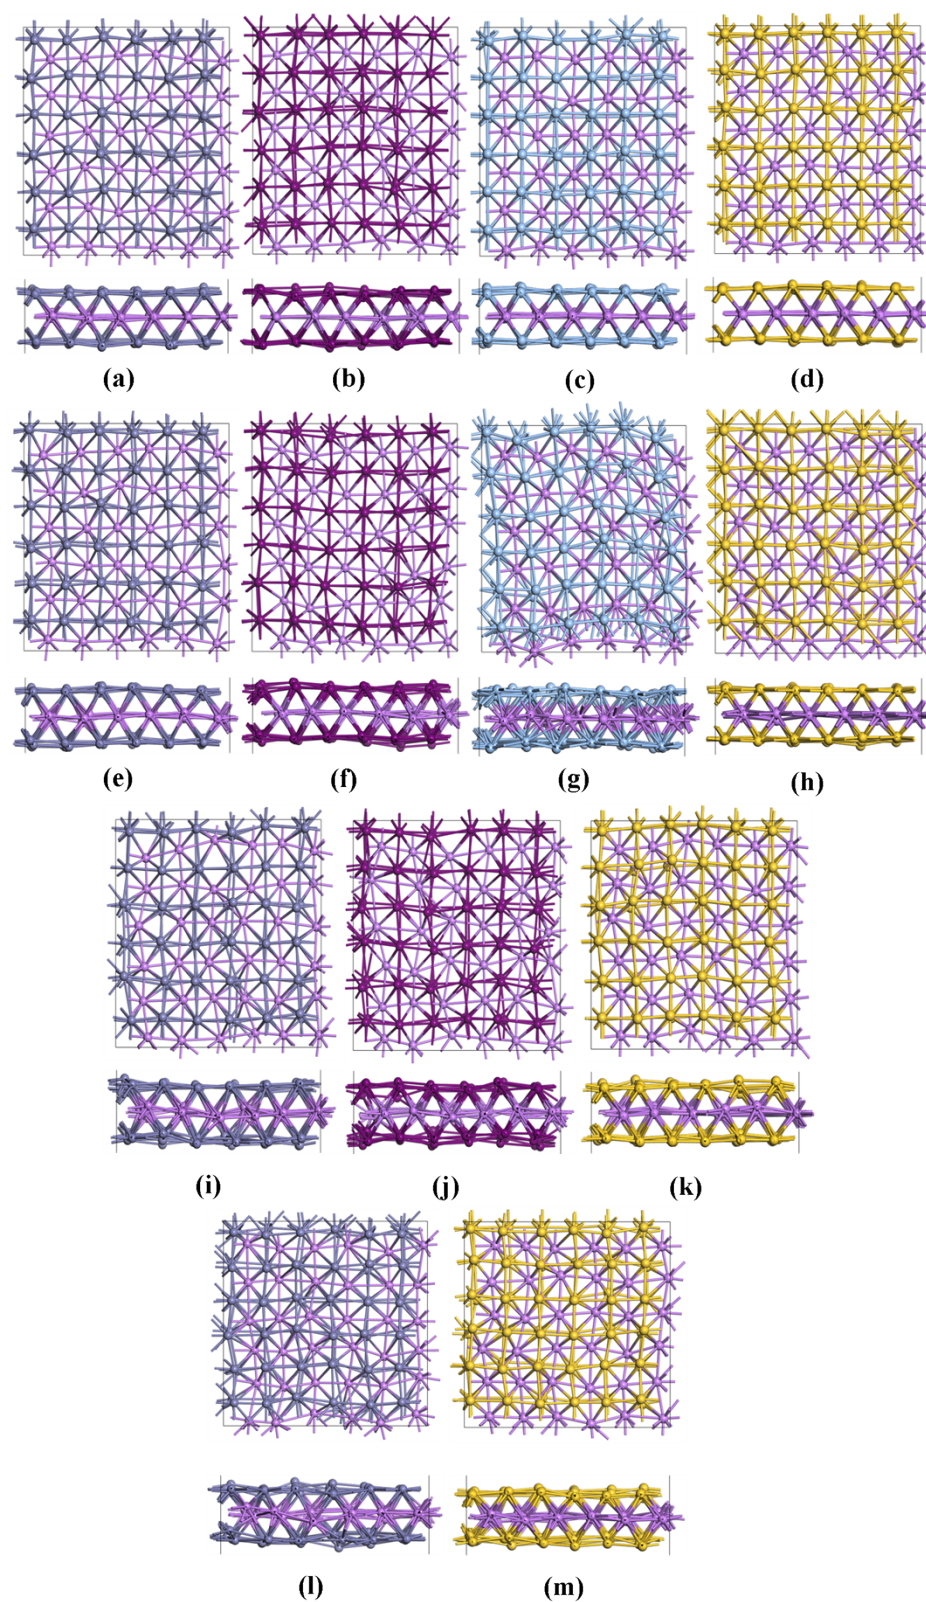

**Fig. S5** Two views of the final structures of  $M_2Li-I$  monolayers through 5 ps's FPMD simulations:  $Sb_2Li-I$  (a),  $Bi_2Li-I$  (b),  $Ag_2Li-I$  (c) and  $Au_2Li-I$  (d) at 300 K;  $Sb_2Li-I$  (e),  $Bi_2Li-I$  (f),  $Ag_2Li-I$  (g) and  $Au_2Li-I$  (h) at 500 K;  $Sb_2Li-I$  (i),  $Bi_2Li-I$  (j) and  $Au_2Li-I$  (k) at 800 K;  $Sb_2Li-I$  (l) and  $Au_2Li-I$  (m) at 1000 K, respectively.



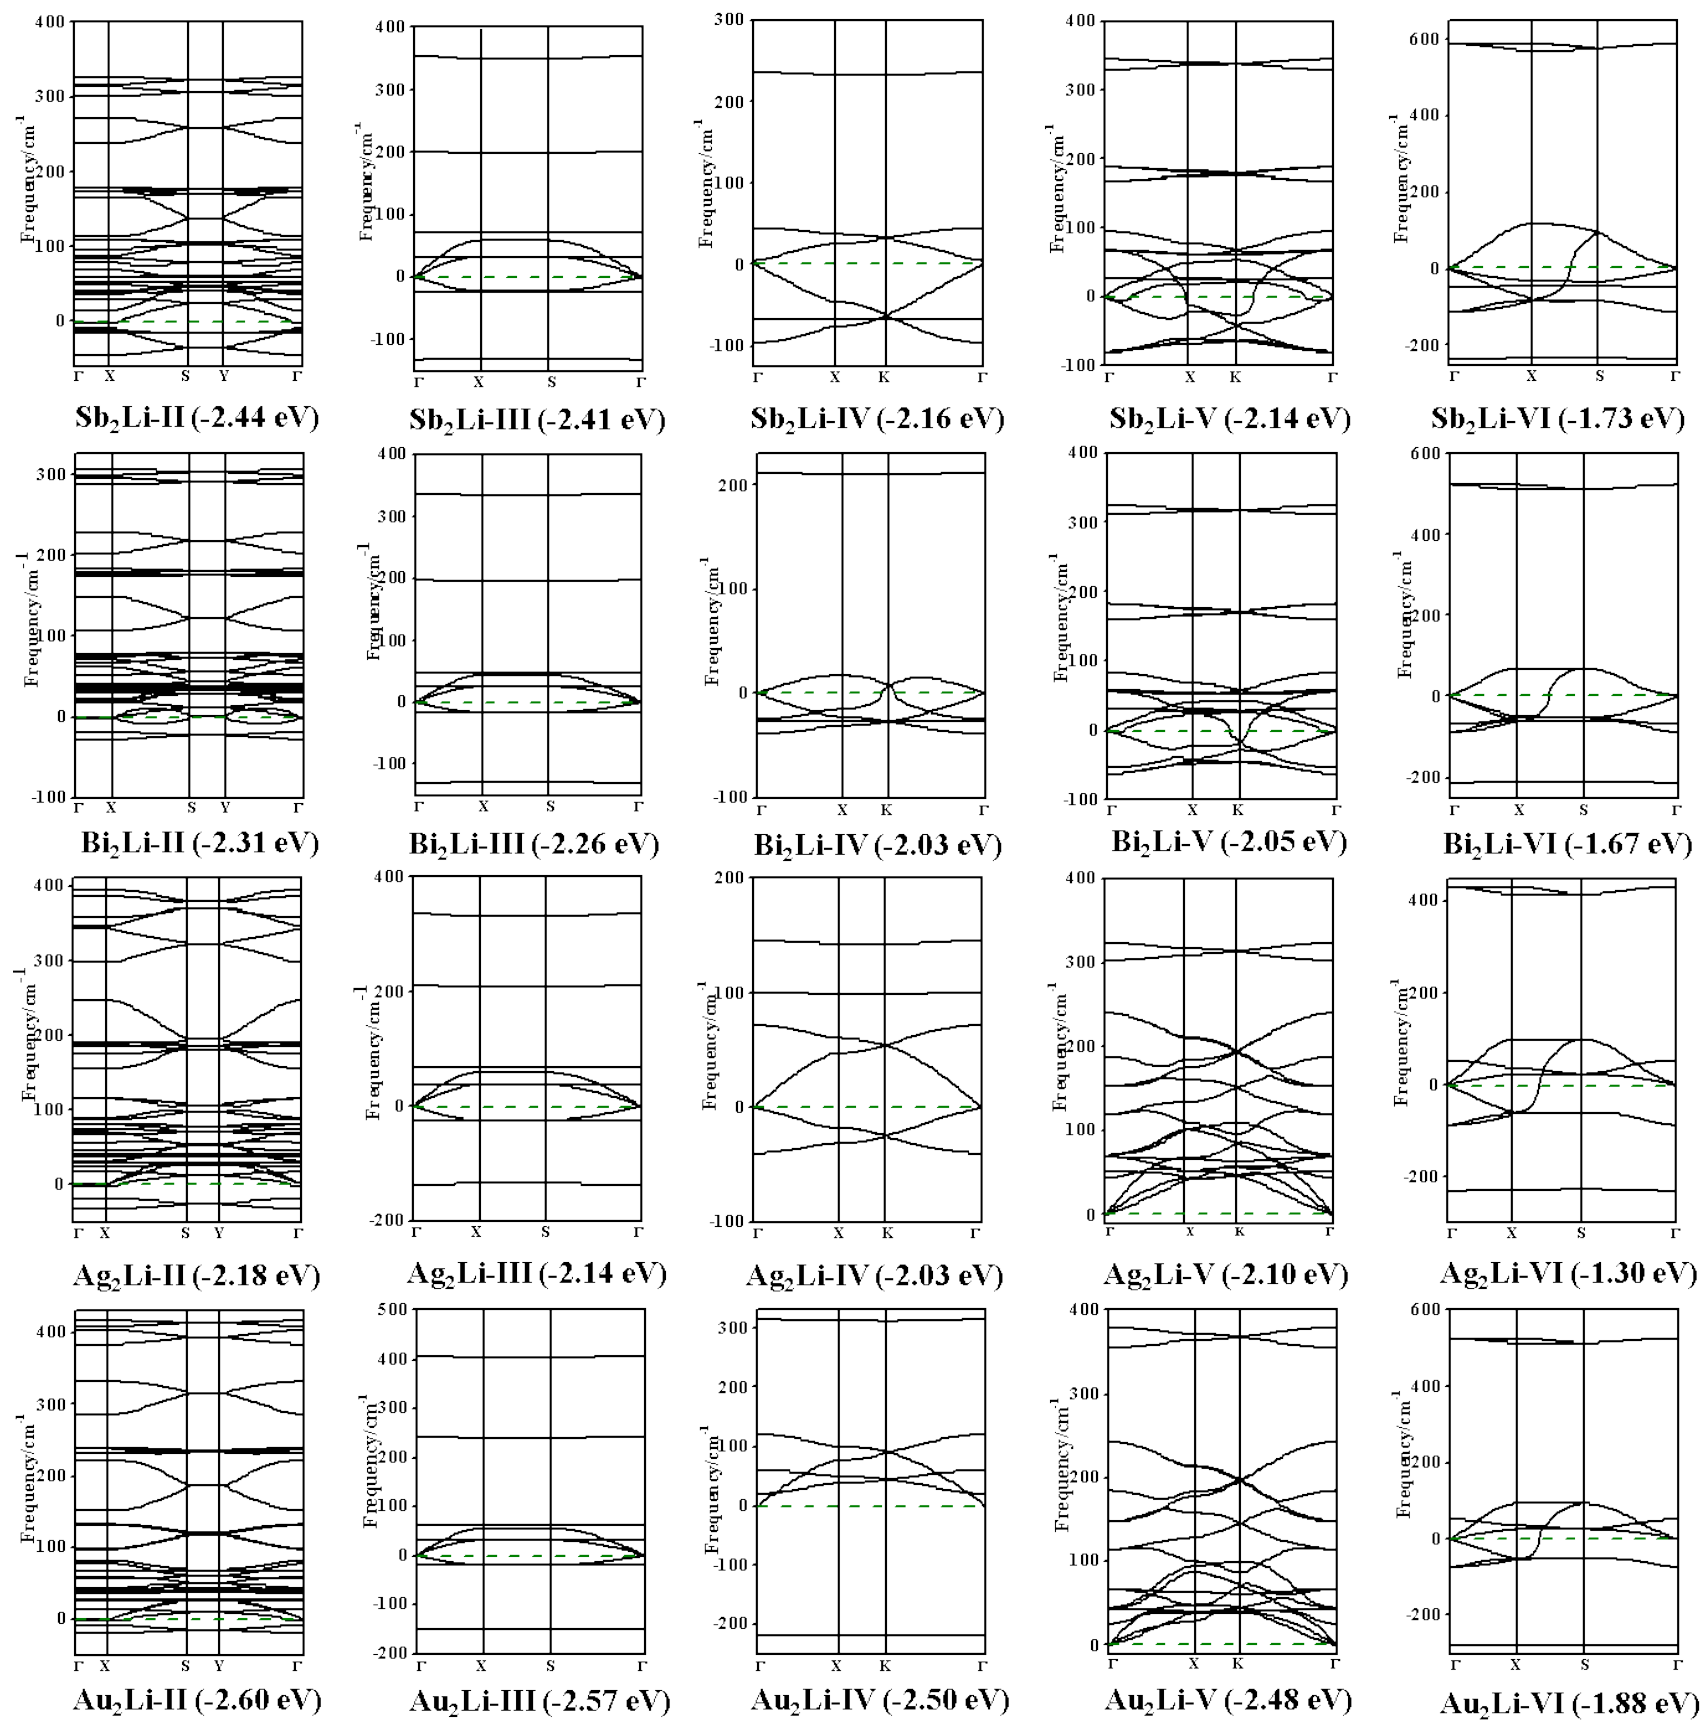

**Fig. S6** The computed phonon dispersions of the PSO searched M<sub>2</sub>Li sheets. Data in parenthesis are the cohesive energies per atom.

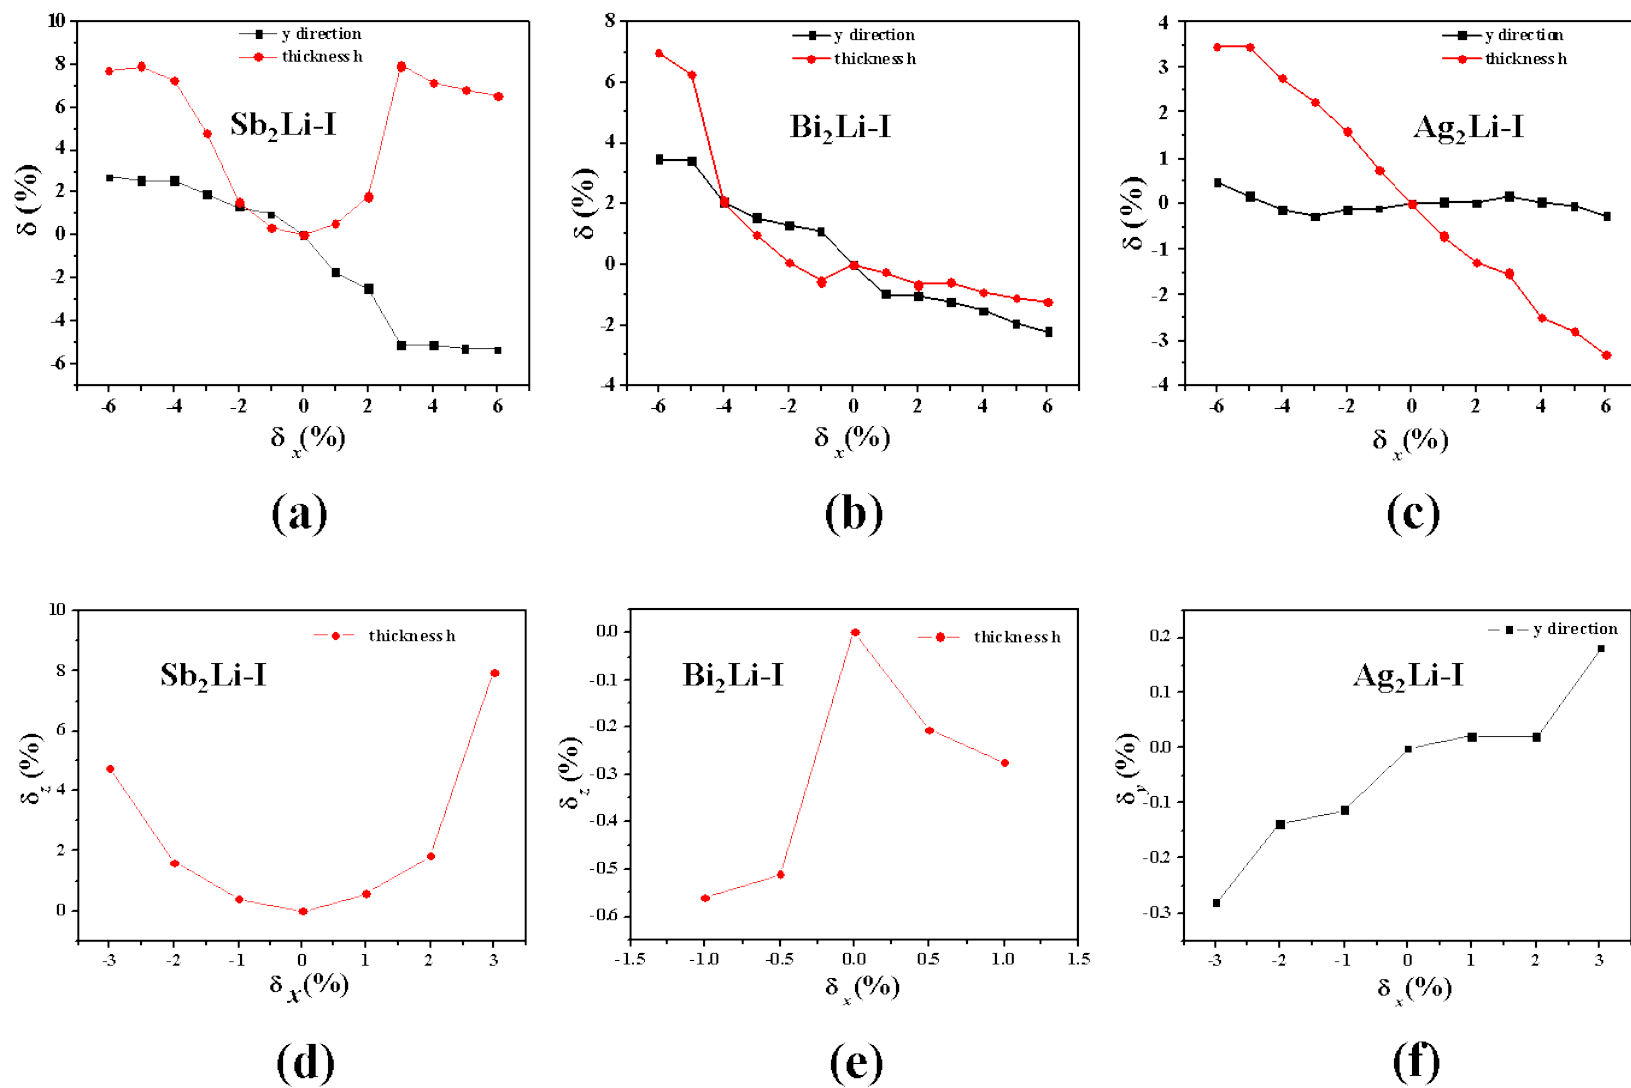

**Fig. S7** Mechanical response ( $\delta_y$  and thickness  $\delta_z$ ) of the Sb<sub>2</sub>Li-I (a), Bi<sub>2</sub>Li-I (b), and Ag<sub>2</sub>Li-I (c) monolayers under the uniaxial strain along the  $x$  direction ( $\delta_x$  ranging from -6% to 6%). Mechanical response ( $\delta_y$  or thickness  $\delta_z$ ) of the half-auxetic Sb<sub>2</sub>Li-I (d), Bi<sub>2</sub>Li-I (e) and Ag<sub>2</sub>Li-I (f) sheets under the uniaxial strain along the  $x$  direction ( $\delta_x$  ranging from -3% to 3%).

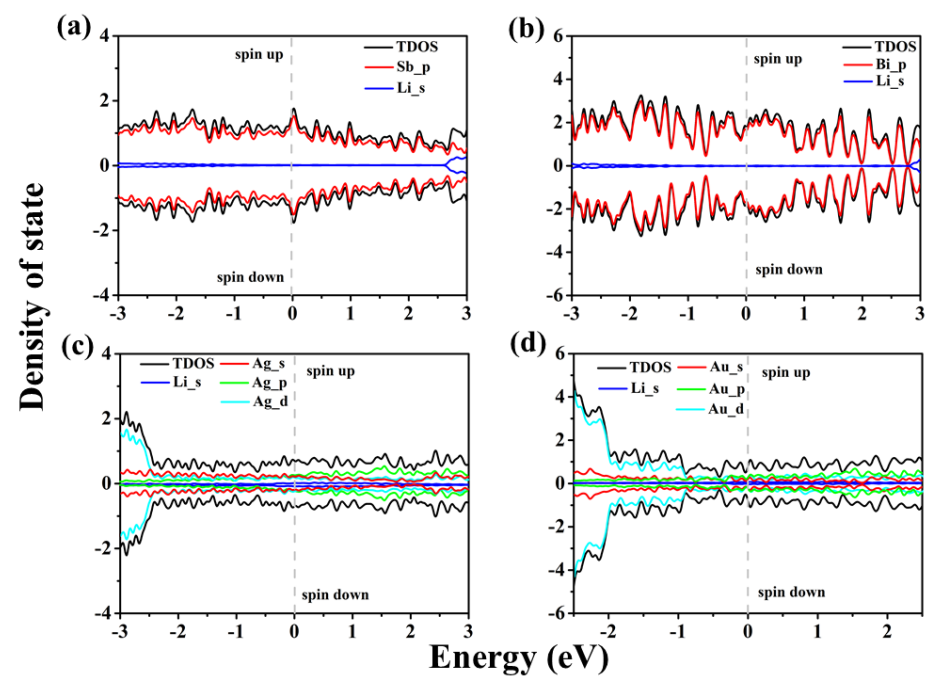

**Fig. S8** Projected density of state (PDOS) considering spin polarization of  $M_2Li-I$  monolayers: (a)  $Sb_2Li-I$ , (b)  $Bi_2Li-I$ , (c)  $Ag_2Li-I$  and (d)  $Au_2Li-I$ . The Fermi level was assigned at 0 eV.

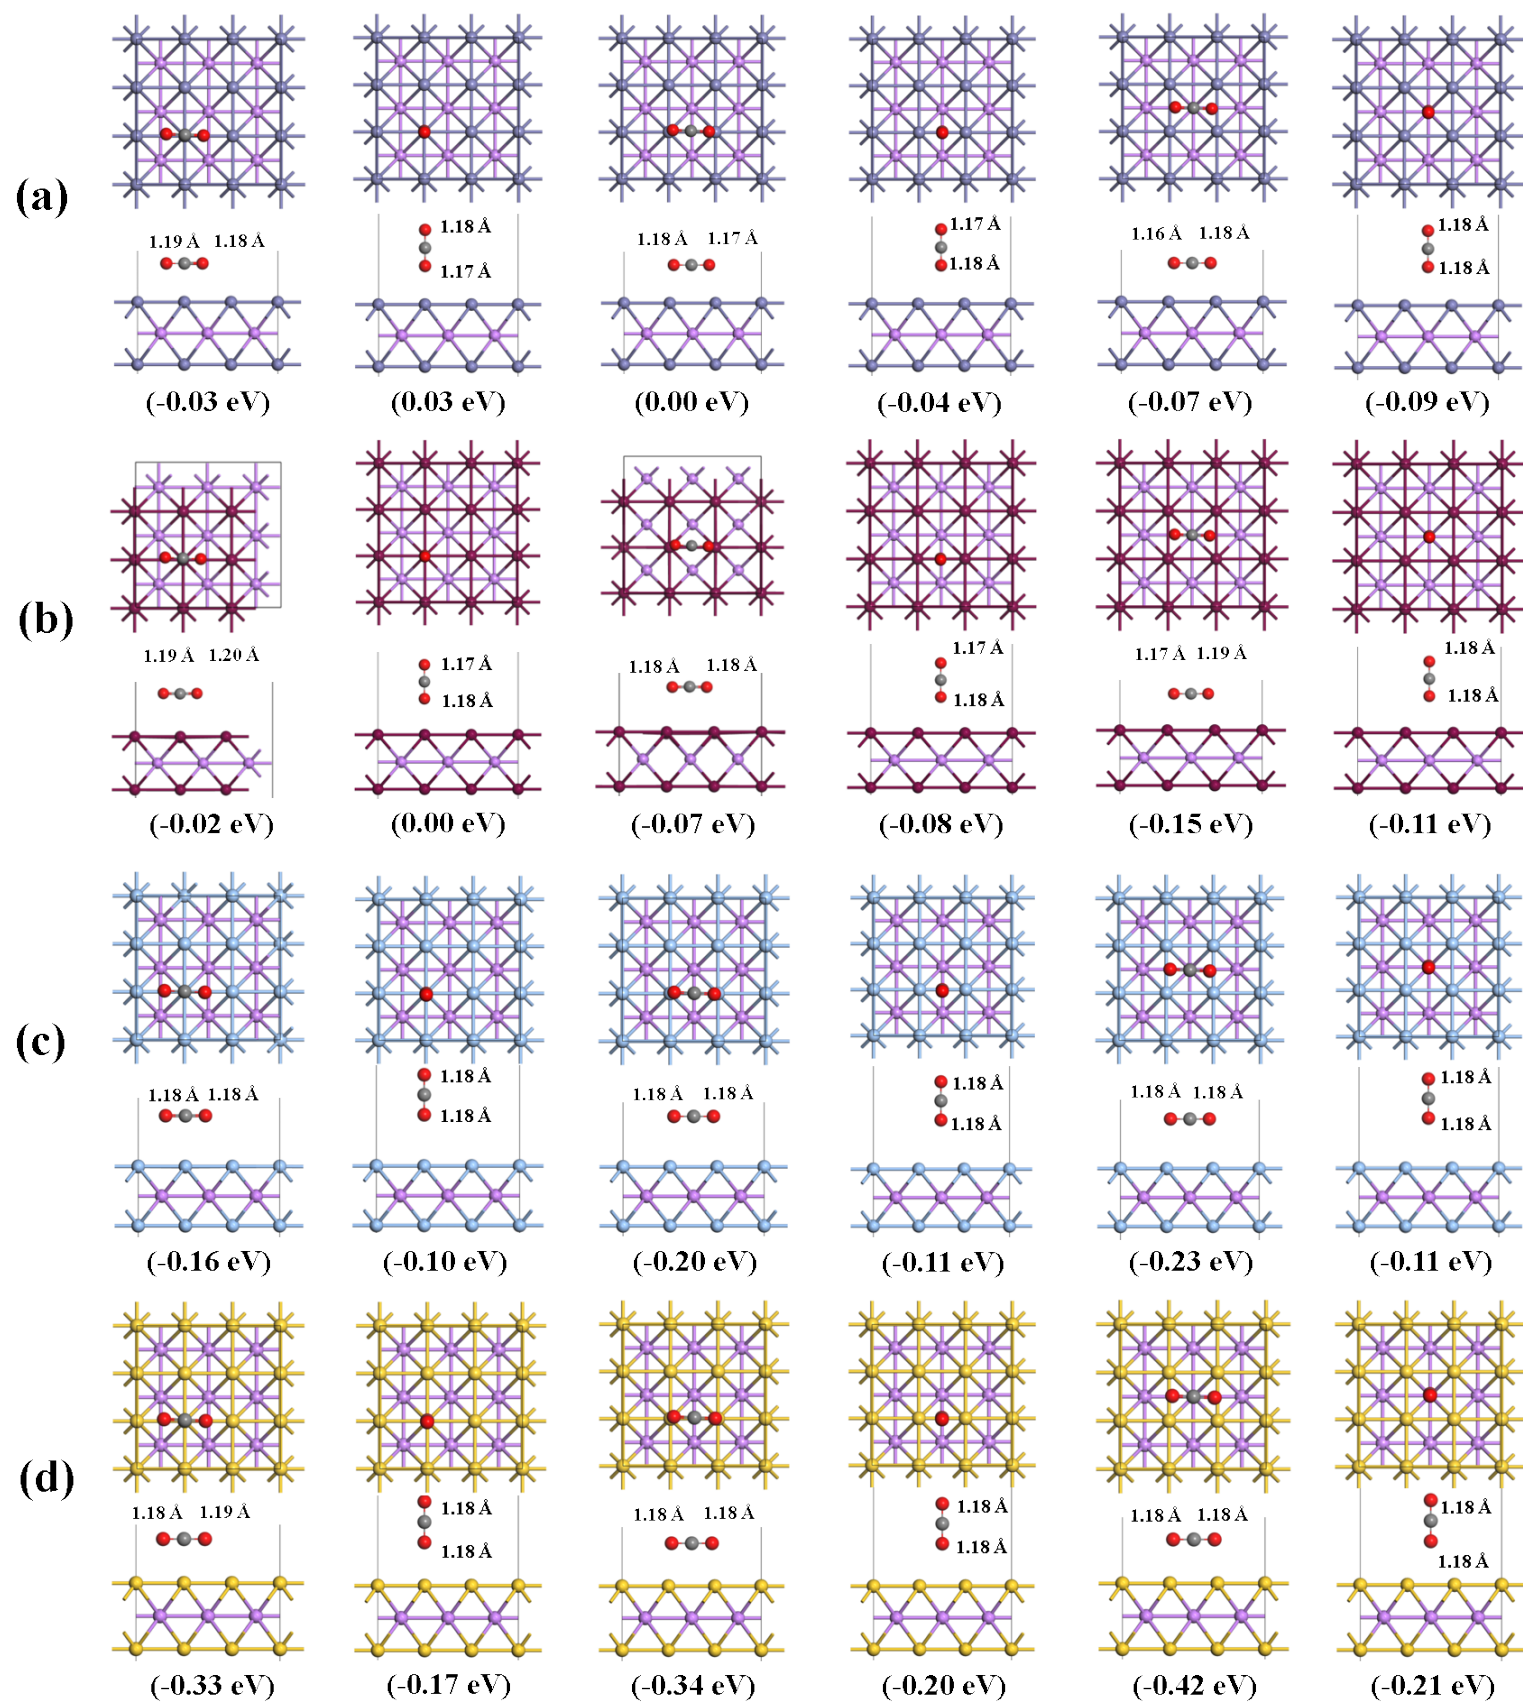

**Fig. S9** Top and side views of the optimized structures of  $\text{CO}_2$  adsorbed at different site of the  $\text{Sb}_2\text{Li-I}$  (a),  $\text{Bi}_2\text{Li-I}$  (b),  $\text{Ag}_2\text{Li-I}$  (c) and  $\text{Au}_2\text{Li-I}$  (d). The adsorption energy of  $\text{CO}_2$  and the C–O bond lengths were given in the corresponding structure.

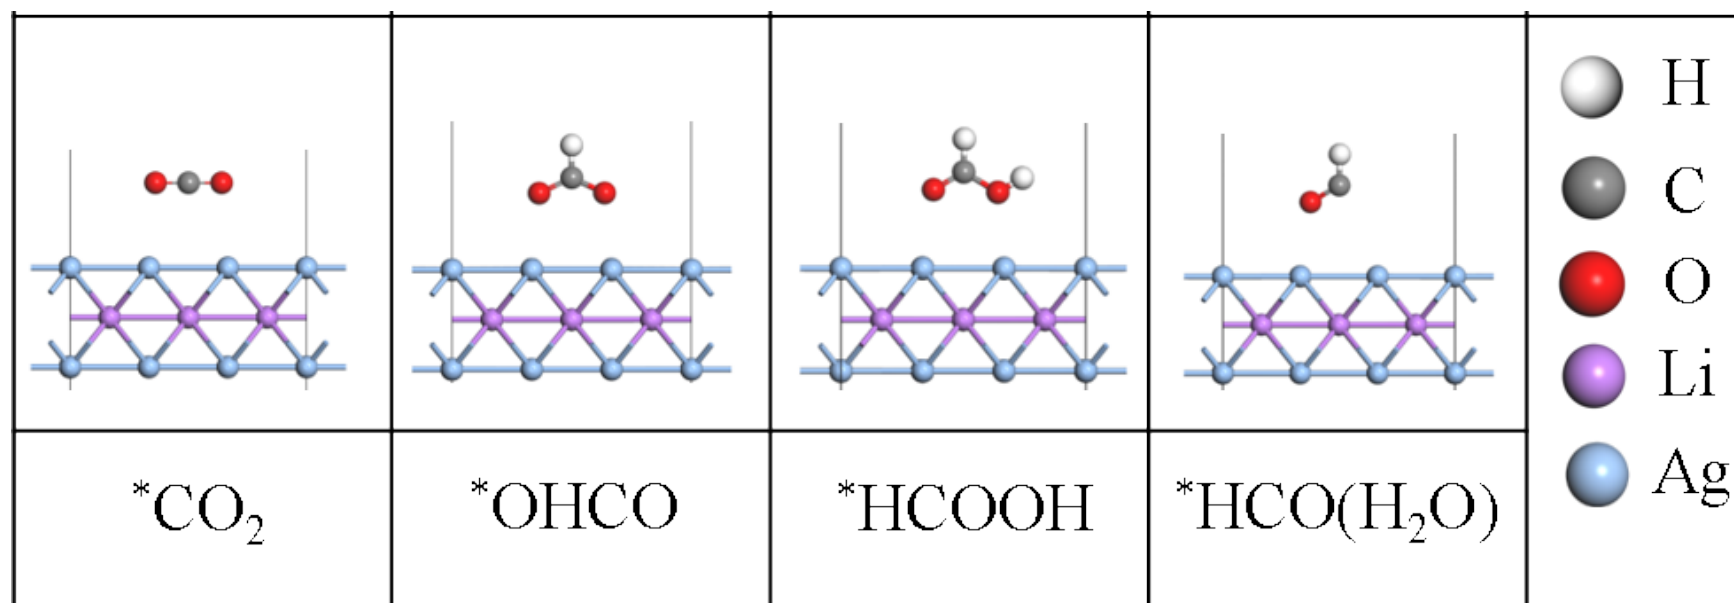

**Fig. S10** The optimized structures of the intermediates along the optimal CO<sub>2</sub>RR route on the Ag<sub>2</sub>Li-I.

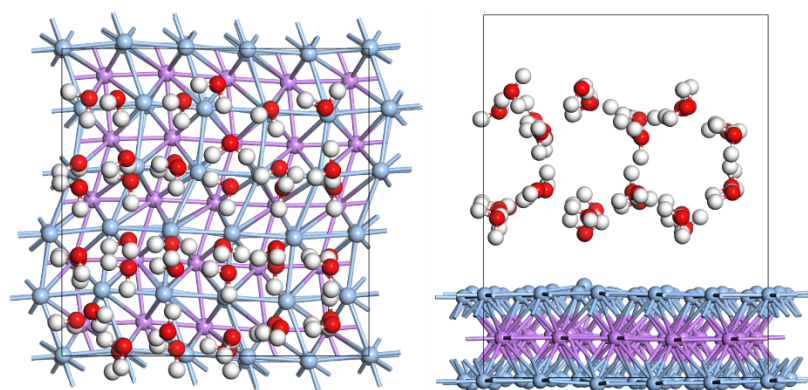

**Fig. S11** The final structures of Ag<sub>2</sub>Li-I with water through 5 ps's FPMD simulation at 300 K.
